# Supplementary material for: Inter-relationship between mitochondrial function and susceptibility to oxidative stress in red- and white-blooded Antarctic notothenioid fishes
Source: Oxford University Press journal article supplement (doi:10.1242/jeb.062042), 2011-10-26
Supplement: jeb062042tables1.pdf [file jeb062042tables1.pdf]

Table S1. Mitochondrial matrix volume and correction factors for non-specific TPMP<sup>+</sup> binding

|                                                 | <i>Chaenocephalus<br/>aceratus</i> | <i>Chionodraco<br/>rastrispinosus</i> | <i>Gobionotothen<br/>gibberifrons</i> | <i>Notothenia coriiceps</i> |
|-------------------------------------------------|------------------------------------|---------------------------------------|---------------------------------------|-----------------------------|
| Matrix volume ( $\mu\text{l mg}^{-1}$ protein)  | 1.52                               | 0.91*                                 | 0.51**                                | 0.51                        |
| TPMP <sup>+</sup> binding (per mg protein) 2°C  | 0.896±0.046                        | 0.920±0.044                           | 0.991**                               | 0.991±0.005                 |
| TPMP <sup>+</sup> binding (per mg protein) 10°C | 0.974±0.021                        | 0.986±0.001                           | 0.964**                               | 0.964±0.014                 |

\*Based on stereological measurements (O'Brien and Sidell, 2000).

\*\*Assumed to be similar to *N. coriiceps* based on stereological measurements (O'Brien and Sidell, 2000; Urschel and O'Brien, 2008).

Non-specific TPMP<sup>+</sup> binding is expressed as means  $\pm$  s.e.m.  $N=2-6$ .
