# Supplementary material for: Inter-relationship between mitochondrial function and susceptibility to oxidative stress in red- and white-blooded Antarctic notothenioid fishes
Source: Oxford University Press journal article supplement (doi:10.1242/jeb.062042), 2011-10-26
Supplement: jeb062042tables2.pdf [file jeb062042tables2.pdf]

Table S2. Abundance of individual phospholipid species in mitochondrial membranes of *Chaenocephalus aceratus* and *Notothenia coriiceps*

|     | Possible species                                                                               | <i>C. aceratus</i> | <i>N. coriiceps</i> |
|-----|------------------------------------------------------------------------------------------------|--------------------|---------------------|
| CL  | 18:2-18:0-22:6-22:6<br>22:6-22:6-18:1-18:1 22:6-20:4-20:3-18:1                                 | 1.12±0.08          | 0.67±0.10*          |
|     | 20:4-20:4-22:6-22:5<br>18:2-22:6-22:6-22:5<br>22:6-22:6-22:6-18:1<br>22:6-22:6-20:4-20:3       | 0.85±0.07          | 0.99±0.07           |
| MPC | D16:0-18:1<br>D16:1-18:0                                                                       | 3.66±0.09          | 1.79±0.10*          |
|     | D16:1-20:5                                                                                     | 2.37±0.08          | 1.75±0.26           |
|     | D16:0-20:5<br>D16:1-20:4                                                                       | 6.17±0.42          | 3.83±0.35*          |
|     | D16:1-22:6<br>D18:2-20:5                                                                       | 2.24±0.22          | 1.85±0.22           |
|     | D16:0-22:6<br>D18:1-20:5<br>D18:2-20:4                                                         | 16.76±1.12         | 17.81±0.90          |
|     | D18:1-22:6                                                                                     | 2.53±0.26          | 2.18±0.20           |
|     | D18:0-22:6<br>D18:1-22:5                                                                       | 1.04±0.06          | 0.93±0.05           |
| LPC | 20:5                                                                                           | 2.63±0.44          | 2.11±0.27           |
|     | 22:6                                                                                           | 6.11±0.91          | 13.33±1.56*         |
| PE  | D16:0-20:5<br>D16:1-20:4                                                                       | 1.48±0.15          | 1.79±0.20           |
|     | P16:0-22:6<br>P18:1-20:5<br>A18:2-20:5<br>P18:2-20:4<br>P18:1-20:4                             | 1.35±0.05          | 1.36±0.08           |
|     | P18:0-20:5<br>A18:1-20:5<br>A16:0-22:6<br>P16:0-22:5<br>P18:2-20:3<br>A16:1-22:5<br>A18:2-20:4 | 1.36±0.09          | 1.84±0.10*          |
|     | D16:1-22:6<br>D18:2-20:5                                                                       | 1.20±0.06          | 1.57±0.06*          |
|     | D16:0-22:6<br>D18:1-20:5<br>D18:2-20:4                                                         | 13.90±1.00         | 13.72±1.05          |
|     | D18:1-20:4<br>D18:0-20:5<br>D16:0-22:5                                                         | 1.46±0.07          | 1.88±0.13*          |
|     | D18:0-20:4<br>D18:1-20:3<br>D16:0-22:4                                                         | 0.80±0.06          | 1.01±0.07           |
|     | P18:1-22:6<br>A18:2-22:6<br>P18:2-22:5                                                         | 2.07±0.08          | 1.41±0.04*          |

2

|            |            |            |
|------------|------------|------------|
| P18:0-22:6 | 1.32±0.06  | 1.41±0.11  |
| P18:1-22:5 |            |            |
| A18:1-22:6 |            |            |
| A18:2-22:5 |            |            |
| D18:1-22:6 | 12.57±0.50 | 8.95±0.67* |
| D18:2-22:5 |            |            |
| D18:0-22:6 | 6.86±0.40  | 5.39±0.48* |
| D18:1-22:5 |            |            |

---

Total phosphate (mmol l<sup>-1</sup>) 18.07±1.61 11.38±0.89\*

---

Values are expressed as means ± s.e.m. *N*=6. Only phospholipids present in amounts > 1 mol% for at least one of the species are shown. When all phospholipid species are included, the total abundance equals 100 mol%. CL, cardiolipin; MPC, major phosphatidylcholine; LPC, lysophosphatidylcholine; PE, phosphatidylethanolamine. D, phosphatidyl (ester linked); A, plasmalogen (alkyl ether linked); and P, plasmalogen (vinyl ether linked). Significant differences in abundance of individual phospholipids between species are indicated with asterisks. *P*<0.05.

---
